# Supplementary material for: Decoupling of Elderly Healthcare Demand and Expenditure in China
Source: MDPI journal article supplement (doi:10.3390/healthcare9101346), 2021-10-10
Supplement: s1 [file s1]

**Table S1.** Descriptive statistics

| Variable            | 1998  |      | 2000  |     | 2002    |         | 2005     |         | 2008-2009 |         | 2011-2012 |         | 2014     |         | 2018     |         |
|---------------------|-------|------|-------|-----|---------|---------|----------|---------|-----------|---------|-----------|---------|----------|---------|----------|---------|
|                     | mean  | SD   | mean  | SD  | mean    | SD      | mean     | SD      | mean      | SD      | mean      | SD      | mean     | SD      | mean     | SD      |
| HCD                 | 7.52  | 2.7  | 7.4   | 2.7 | 7.17    | 2.4     | 7.08     | 2.5     | 6.99      | 2.4     | 7.25      | 2.7     | 7.18     | 2.6     | 7.34     | 2.8     |
| HCE                 | -*    | -    | -     | -   | -       | -       | 3115.51  | 13119.3 | 4197.14   | 15618.1 | 13813     | 38832.3 | 16503.44 | 41585.7 | 8520.92  | 27018.6 |
| gender              | 0.4   | 0.5  | 0.41  | 0.5 | 0.43    | 0.5     | 0.43     | 0.5     | 0.43      | 0.5     | 0.45      | 0.5     | 0.47     | 0.5     | 0.43     | 0.5     |
| age                 | 92.11 | 7.7  | 91.28 | 7.5 | 86.25   | 11.7    | 86.13    | 11.7    | 86.83     | 12      | 85.87     | 11.3    | 84.96    | 9.7     | 85.55    | 11.9    |
| cohabitation status | 1.2   | 0.5  | 1.25  | 0.6 | 1.22    | 0.5     | 1.18     | 0.4     | 1.18      | 0.4     | 1.19      | 0.4     | 1.19     | 0.4     | 1.88     | 0.4     |
| residence           | 0.15  | 0.4  | 0.17  | 0.4 | 0.16    | 0.4     | 0.16     | 0.4     | 0.13      | 0.3     | 0.11      | 0.3     | 0.12     | 0.3     | 0.16     | 0.4     |
| region              | 1.68  | 0.7  | 1.68  | 0.7 | 1.66    | 0.7     | 1.84     | 0.8     | 1.67      | 0.7     | 1.66      | 0.7     | 1.73     | 0.7     | 2.36     | 0.7     |
| education           | 2.27  | 7.7  | 1.83  | 3.4 | 2.02    | 3.5     | 2.11     | 3.5     | 2.06      | 3.4     | 2.33      | 3.5     | 2.57     | 3.6     | 3.55     | 6.7     |
| household income    | -     | -    | -     | -   | 7939.58 | 20786.2 | 12625.13 | 25088.6 | 22518.57  | 26275.6 | 30532.93  | 30309.3 | 37830.94 | 32465.8 | 44709.13 | 37351.8 |
| BOAI                | -     | -    | -     | -   | -       | -       | 0.06     | 0.2     | 0.07      | 0.3     | 0.18      | 0.4     | 0.29     | 0.5     | 0.3      | 0.5     |
| BMI                 | -     | -    | -     | -   | -       | -       | 0.1      | 0.3     | 0.16      | 0.4     | 0.66      | 0.5     | 0.65     | 0.5     | 0.62     | 0.5     |
| living arrangements | 2.06  | 0.3  | 2.06  | 0.3 | 2.03    | 0.3     | 2.03     | 0.2     | 2.01      | 0.2     | 2.01      | 0.2     | 2        | 0.2     | 2.03     | 0.2     |
| children number     | 5.94  | 11.1 | 4.59  | 2.7 | 4.55    | 2.5     | 4.5      | 2.4     | 4.36      | 2.2     | 4.35      | 2.1     | 4.37     | 2       | 4.22     | 5.2     |

\* “-” represents unavailable data. Due to the continuous enrichment of CLHLS survey content, there are some unavailable data before 2005

**Table S2.** Influencing factors of elderly HCD in China (1998-2018)

|                     |                             | 1998  |      | 2000  |      | 2002  |      | 2005  |      | 2008-2009 |      | 2011-2012 |      | 2014  |      | 2018   |      |
|---------------------|-----------------------------|-------|------|-------|------|-------|------|-------|------|-----------|------|-----------|------|-------|------|--------|------|
|                     |                             | mean  | %    | mean  | %    | mean  | %    | mean  | %    | mean      | %    | mean      | %    | mean  | %    | mean   | %    |
| Gender              | female                      | 7.869 | 60   | 7.671 | 58.7 | 7.455 | 57.4 | 7.343 | 57.3 | 7.255     | 57.3 | 7.511     | 54.9 | 7.405 | 53.4 | 7.67   | 57.1 |
|                     | male                        | 6.998 | 40   | 7.022 | 41.3 | 6.779 | 42.6 | 6.723 | 42.7 | 6.635     | 42.7 | 6.93      | 45.1 | 6.917 | 46.6 | 6.963  | 42.9 |
| Age                 | non-elderly                 | 6.376 | 6.2  | 6.482 | 5.5  | 6.185 | 32.7 | 6.189 | 33.9 | 6.168     | 30.3 | 6.287     | 35   | 6.374 | 39.3 | 6.208  | 37.6 |
|                     | old age                     | 7.596 | 93.8 | 7.457 | 94.5 | 7.645 | 67.3 | 7.535 | 66.1 | 7.348     | 69.7 | 7.767     | 65   | 7.698 | 60.7 | 8.064  | 62.4 |
| Residence           | country                     | 7.553 | 84.8 | 7.397 | 83.3 | 7.141 | 84.4 | 7.064 | 84.5 | 6.965     | 87.2 | 7.219     | 89.5 | 7.151 | 88.5 | 7.341  | 83.3 |
|                     | city                        | 7.338 | 15.2 | 7.43  | 16.7 | 7.31  | 15.6 | 7.159 | 15.5 | 7.166     | 12.8 | 7.504     | 10.5 | 7.381 | 11.5 | 7.495  | 16.7 |
| Region              |                             |       |      |       |      |       |      |       |      |           |      |           |      |       |      |        |      |
|                     | eastern                     | 7.723 | 48.3 | 7.587 | 47.7 | 7.288 | 48.1 | 7.243 | 45.3 | 7.137     | 46.4 | 7.363     | 48.1 | 7.172 | 43.9 | 7.548  | 50.6 |
| Income level        | central                     | 7.33  | 35.6 | 7.265 | 36.4 | 7.06  | 37.3 | 7.135 | 25.8 | 6.877     | 40   | 7.164     | 38.2 | 7.244 | 39.7 | 7.125  | 35.8 |
|                     | central                     | 7.33  | 35.6 | 7.265 | 36.4 | 7.06  | 37.3 | 7.135 | 25.8 | 6.877     | 40   | 7.164     | 38.2 | 7.244 | 39.7 | 7.125  | 35.8 |
|                     | low                         |       |      |       |      | 7.111 | 31.5 | 7.022 | 29.9 | 6.75      | 30.1 | 6.983     | 27.6 | 6.963 | 30.2 | 7.236  | 30.8 |
|                     | medium                      |       |      |       |      | 7.074 | 34.4 | 7.026 | 36.9 | 7.031     | 39.9 | 7.392     | 41   | 7.342 | 35.4 | 7.388  | 37.2 |
|                     | high                        |       |      |       |      | 7.314 | 34.1 | 7.189 | 33.1 | 7.178     | 30   | 7.296     | 31.4 | 7.196 | 34.3 | 7.467  | 32   |
| BOAI                | no                          |       |      |       |      |       |      | 7.062 | 94.5 | 6.985     | 93.1 | 7.27      | 82.4 | 7.221 | 70.9 | 7.391  | 70.3 |
|                     | yes                         |       |      |       |      |       |      | 7.376 | 5.5  | 7.069     | 6.9  | 7.151     | 17.6 | 7.071 | 29.1 | 7.292  | 29.7 |
| BMI                 | no                          |       |      |       |      |       |      | 7.089 | 90.1 | 6.993     | 84.5 | 7.532     | 33.7 | 7.4   | 35.1 | 7.637  | 38.3 |
| Living arrangements | yes                         |       |      |       |      |       |      | 6.983 | 9.9  | 6.979     | 15.5 | 7.106     | 66.3 | 7.057 | 64.9 | 7.189  | 61.7 |
|                     | Self                        | 6.292 | 1.1  | 6.312 | 2    | 6.27  | 2    | 6.1   | 1.7  | 6.081     | 2.1  | 6.097     | 1.8  | 6.085 | 1.6  | 6.132  | 1.7  |
|                     | family and friends          | 7.531 | 92.3 | 7.367 | 90.2 | 7.108 | 92.6 | 7.028 | 94   | 6.959     | 95   | 7.204     | 95.5 | 7.159 | 96.5 | 7.265  | 94   |
|                     | government and institutions | 7.612 | 6.6  | 8.088 | 7.8  | 8.53  | 5.4  | 8.584 | 4.3  | 8.725     | 2.9  | 9.631     | 2.7  | 9.059 | 1.9  | 10.038 | 4.3  |

**Table S3.** Influencing factors of elderly HCE in China (2005-2018)

|                     |                             | 2005     |       | 2008-2009 |       | 2011-2012 |       | 2014      |       | 2018      |       |
|---------------------|-----------------------------|----------|-------|-----------|-------|-----------|-------|-----------|-------|-----------|-------|
|                     |                             | mean     | %     | mean      | %     | mean      | %     | mean      | %     | mean      | %     |
| Gender              | female                      | 2895.994 | 57.30 | 4161.032  | 57.30 | 13387.733 | 54.90 | 16133.612 | 53.40 | 8253.46   | 57.10 |
|                     | male                        | 3410.462 | 42.70 | 4245.634  | 42.70 | 14335.528 | 45.10 | 16927.267 | 46.60 | 9248.637  | 42.90 |
| Age                 | non-elderly                 | 3011.427 | 33.90 | 3998.284  | 30.30 | 11722.107 | 35.00 | 14293.72  | 39.30 | 8876.945  | 37.60 |
|                     | old age                     | 3168.866 | 66.10 | 4283.625  | 69.70 | 14926.553 | 65.00 | 17935.461 | 60.70 | 8561.769  | 62.40 |
| Residence           | country                     | 2894.479 | 84.50 | 4028.27   | 87.20 | 12803.671 | 89.50 | 16386.342 | 88.50 | 7734.804  | 83.30 |
|                     | city                        | 4317.683 | 15.50 | 5344.654  | 12.80 | 22395.414 | 10.50 | 17402.422 | 11.50 | 13363.969 | 16.70 |
| Region              | eastern                     | 4335.053 | 45.30 | 6384.102  | 46.40 | 15569.863 | 48.10 | 16496.724 | 43.90 | 10724.68  | 50.60 |
|                     | central                     | 2747.677 | 25.80 | 1721.334  | 40.00 | 12050.759 | 38.20 | 18380.346 | 39.70 | 5915.358  | 35.80 |
|                     | western                     | 1528.199 | 28.90 | 4019.876  | 13.70 | 12624.343 | 13.70 | 11990.796 | 16.40 | 8603.872  | 13.60 |
| Income level        | low                         | 1495.403 | 29.90 | 1914.638  | 30.10 | 11410.61  | 27.60 | 11191.397 | 30.20 | 5143.596  | 30.80 |
|                     | medium                      | 1680.207 | 36.90 | 2482.387  | 39.90 | 9630.919  | 41.00 | 10985.805 | 35.40 | 7656.176  | 37.20 |
|                     | high                        | 6177.406 | 33.10 | 8758.858  | 30.00 | 21359.86  | 31.40 | 26879.913 | 34.30 | 13215.437 | 32.00 |
| BOAI                | no                          | 3048.229 | 94.50 | 3779.979  | 93.10 | 14037.244 | 82.40 | 18051.785 | 70.90 | 8591.743  | 70.30 |
|                     | yes                         | 4288.195 | 5.50  | 9868.705  | 6.90  | 12762.423 | 17.60 | 12726.485 | 29.10 | 8584.787  | 29.70 |
| BMI                 | no                          | 2971.473 | 90.10 | 3640.816  | 84.50 | 18084.697 | 33.70 | 19389.341 | 35.10 | 11432.579 | 38.30 |
|                     | yes                         | 4435.244 | 9.90  | 7226.133  | 15.50 | 11618.125 | 66.30 | 14940.657 | 64.90 | 7004.465  | 61.70 |
| Living arrangements | self                        | 3534.415 | 1.70  | 6086.95   | 2.10  | 20976.111 | 1.80  | 16895.085 | 1.60  | 12845.353 | 1.70  |
|                     | family and friends          | 2867.562 | 94.00 | 3948.022  | 95.00 | 13088.972 | 95.50 | 15887.967 | 96.50 | 8123.845  | 94.00 |
|                     | government and institutions | 8389.505 | 4.30  | 11079.271 | 2.90  | 33962.433 | 2.70  | 47607.088 | 1.90  | 18729.447 | 4.30  |

**Table S4.** Multiple linear regression on elderly HCD

| Variable                               | 2005      |       |        |        |        | 2014      |       |        |        |        |
|----------------------------------------|-----------|-------|--------|--------|--------|-----------|-------|--------|--------|--------|
|                                        | B         | SE    | t      | LLCI   | ULCI   | B         | SE    | t      | LLCI   | ULCI   |
| (Constant)                             | 0.110     | 0.202 | 0.544  | -0.286 | 0.505  | -1.773*** | 0.496 | -3.575 | -2.746 | -0.801 |
| gender (female = reference)            | -0.386*** | 0.041 | -9.501 | -0.466 | -0.306 | -0.342*** | 0.087 | -3.913 | -0.514 | -0.171 |
| age                                    | 0.068***  | 0.002 | 41.231 | 0.065  | 0.072  | 0.092***  | 0.004 | 20.991 | 0.083  | 0.101  |
| Residence (country = reference)        | 0.037     | 0.054 | 0.696  | -0.068 | 0.142  | 0.075     | 0.134 | 0.561  | -0.187 | 0.337  |
| live type (live alone = reference)     |           |       |        |        |        |           |       |        |        |        |
| live with family                       | 0.675***  | 0.055 | 12.214 | 0.566  | 0.783  | 0.780***  | 0.112 | 6.947  | 0.560  | 1.000  |
| live in institution                    | -0.149    | 0.155 | -0.967 | -0.452 | 0.154  | 0.351     | 0.397 | 0.886  | -0.426 | 1.129  |
| region (western = reference)           |           |       |        |        |        |           |       |        |        |        |
| central                                | 0.383***  | 0.050 | 7.689  | 0.285  | 0.480  | 0.395***  | 0.118 | 3.335  | 0.163  | 0.627  |
| eastern                                | 0.518***  | 0.045 | 11.506 | 0.430  | 0.606  | 0.404***  | 0.118 | 3.435  | 0.173  | 0.635  |
| education                              | 0.016***  | 0.006 | 2.687  | 0.004  | 0.028  | 0.006     | 0.013 | 0.426  | -0.020 | 0.032  |
| household income                       | 0.000***  | 0.000 | -4.116 | 0.000  | 0.000  | 0.000**   | 0.000 | -2.154 | 0.000  | 0.000  |
| BOAI (no = reference)                  | 0.058     | 0.076 | 0.765  | -0.090 | 0.206  | 0.021     | 0.089 | 0.240  | -0.153 | 0.196  |
| BMI (no = reference)                   | 0.050     | 0.063 | 0.793  | -0.073 | 0.173  | -0.382*** | 0.095 | -4.038 | -0.568 | -0.197 |
| living arrangements (self = reference) |           |       |        |        |        |           |       |        |        |        |
| family and friends                     | 0.213     | 0.142 | 1.496  | -0.066 | 0.492  | 0.443     | 0.318 | 1.393  | -0.181 | 1.066  |
| government and institutions            | 1.730***  | 0.180 | 9.615  | 1.377  | 2.083  | 1.969***  | 0.474 | 4.155  | 1.040  | 2.898  |
| children number                        | 0.015*    | 0.008 | 1.906  | 0.000  | 0.031  | 0.039*    | 0.021 | 1.913  | -0.001 | 0.080  |
| R <sup>2</sup>                         |           |       | 0.149  |        |        |           |       | 0.157  |        |        |
| Prob>F                                 |           |       | 0.000  |        |        |           |       | 0.000  |        |        |

Note: The level of significance \*\*\* P<0.01, \*\* P<0.05, \* P<0.1; Abbreviations: B: beta, regression coefficient; SE: standard error; LLCI: lower limit confidence interval; ULCI: upper limit confidence interval. Household income's beta in 2005=-3.085\*10<sup>-6</sup>, in 2014=-2.847\*10<sup>-6</sup>.

**Table S5.** Multiple linear regression on elderly HCE

| Variable                               | 2005     |       |        |        |        | 2014      |       |        |        |        |
|----------------------------------------|----------|-------|--------|--------|--------|-----------|-------|--------|--------|--------|
|                                        | B        | SE    | t      | LLCI   | ULCI   | B         | SE    | t      | LLCI   | ULCI   |
| (Constant)                             | 2.245*** | 0.069 | 32.340 | 2.109  | 2.381  | 3.559***  | 0.196 | 18.120 | 3.173  | 3.944  |
| gender (female = reference)            | -0.031** | 0.014 | -2.208 | -0.058 | -0.003 | 0.018     | 0.035 | 0.517  | -0.050 | 0.086  |
| age                                    | -0.001** | 0.001 | -2.060 | -0.002 | 0.000  | -0.005*** | 0.002 | -3.038 | -0.009 | -0.002 |
| Residence (country = reference)        | 0.134*** | 0.018 | 7.316  | 0.098  | 0.170  | -0.005    | 0.053 | -0.105 | -0.109 | 0.098  |
| live type (live alone = reference)     |          |       |        |        |        |           |       |        |        |        |
| live with family                       | 0.104*** | 0.019 | 5.393  | 0.066  | 0.142  | -0.032    | 0.045 | -0.712 | -0.120 | 0.056  |
| live in institution                    | -0.084   | 0.053 | -1.587 | -0.187 | 0.020  | 0.261     | 0.168 | 1.549  | -0.069 | 0.591  |
| Region (western = reference)           |          |       |        |        |        |           |       |        |        |        |
| central                                | 0.262*** | 0.017 | 15.518 | 0.229  | 0.295  | 0.116**   | 0.046 | 2.499  | 0.025  | 0.207  |
| eastern                                | 0.333*** | 0.015 | 21.931 | 0.303  | 0.363  | 0.096**   | 0.046 | 2.101  | 0.006  | 0.186  |
| education                              | 0.020*** | 0.002 | 9.512  | 0.016  | 0.024  | -0.001    | 0.005 | -0.148 | -0.011 | 0.010  |
| household income                       | 0.000*** | 0.000 | 20.026 | 0.000  | 0.000  | 0.000***  | 0.000 | 11.286 | 0.000  | 0.000  |
| BOAI (no = reference)                  | 0.072*** | 0.026 | 2.762  | 0.021  | 0.124  | -0.108*** | 0.035 | -3.065 | -0.178 | -0.039 |
| BMI (no = reference)                   | 0.176*** | 0.021 | 8.232  | 0.134  | 0.218  | -0.212*** | 0.038 | -5.613 | -0.286 | -0.138 |
| living arrangements (self = reference) |          |       |        |        |        |           |       |        |        |        |
| family and friends                     | 0.100**  | 0.050 | 1.986  | 0.001  | 0.199  | 0.122     | 0.126 | 0.970  | -0.125 | 0.369  |
| government and institutions            | 0.396*** | 0.062 | 6.335  | 0.273  | 0.518  | 0.510***  | 0.190 | 2.683  | 0.137  | 0.883  |
| children number                        | 0.007*** | 0.003 | 2.639  | 0.002  | 0.012  | 0.014*    | 0.008 | 1.703  | -0.002 | 0.030  |
| R <sup>2</sup>                         |          |       | 0.125  |        |        |           |       | 0.086  |        |        |
| Prob>F                                 |          |       | 0.000  |        |        |           |       | 0.000  |        |        |

Note: The level of significance \*\*\* P<0.01, \*\* P<0.05, \* P<0.1; Abbreviations: B: beta, regression coefficient; SE: standard error; LLCI: lower limit confidence interval; ULCI: upper limit confidence interval. Household income's beta in 2005=5.384\*10<sup>-6</sup>, in 2014=5.959\*10<sup>-6</sup>.
